# Supplementary material for: Adsorption and dehydrogenation of C2–C6n-alkanes over a Pt catalyst: a theoretical study on the size effects of alkane molecules and Pt substrates
Source: Royal Society of Chemistry journal article supplement (doi:10.1039/d0cp03194a), 2020-01-01
Supplement: d0cp03194a1.pdf [file d0cp03194a1.pdf]

## Electronic Supplementary Information

### **Adsorption and Dehydrogenation of C<sub>2</sub>–C<sub>6</sub> N-alkanes over Pt catalyst: Theoretical Study on Size Effects of Alkane Molecule and Pt Substrate**

Xuefei Ding,<sup>‡</sup> Houyu Zhu,<sup>‡\*</sup> Hao Ren, Dongyuan Liu, Zehua Yu, Naiyou Shi, Wenyue Guo\*

*School of Materials Science and Engineering, China University of Petroleum (East China), Qingdao, Shandong 266580, China*

\*Corresponding authors: Houyu Zhu, Wenyue Guo

E-mail address: [hyzhu@upc.edu.cn](mailto:hyzhu@upc.edu.cn), [wycuo@upc.edu.cn](mailto:wycuo@upc.edu.cn)

<sup>‡</sup> These authors have made an equal contribution to this work.

**Table S1.** Adsorption Energies ( $\Delta E_{\text{ads}}$ , eV) and average C–H bond lengths ( $\text{\AA}$ ) of  $\text{CH}_4$  on Pt(111) and  $\text{Pt}_{55}$ .

|                         | Pt Substrates    | $\Delta E_{\text{ads}}$ | $d_{\text{C-H}}$ |
|-------------------------|------------------|-------------------------|------------------|
| $\text{CH}_4(\text{g})$ | -                | -                       | 1.098            |
| $\text{CH}_4$           | Pt(111)          | -0.28                   | 1.098            |
|                         | $\text{Pt}_{55}$ | -1.18                   | 1.101            |

**Table S2.** ZPE-corrected reaction energies ( $\Delta E_r$ , eV) and energy barriers ( $E_a$ , eV) for the dehydrogenation reactions of C<sub>2</sub>–C<sub>6</sub> *n*-alkanes on Pt(111), Pt<sub>55</sub>, and Pt<sub>38</sub>.

| Reactions                                                           | Pt(111)      |       | Pt <sub>55</sub> |       | Pt <sub>38</sub> |       |
|---------------------------------------------------------------------|--------------|-------|------------------|-------|------------------|-------|
|                                                                     | $\Delta E_r$ | $E_a$ | $\Delta E_r$     | $E_a$ | $\Delta E_r$     | $E_a$ |
| C <sub>2</sub> H <sub>6</sub> → C <sub>2</sub> H <sub>5</sub> + H   | -0.11        | 0.71  | -0.50            | 0.46  | -0.73            | 0.22  |
| C <sub>2</sub> H <sub>5</sub> → C <sub>2</sub> H <sub>4</sub> + H   | -0.47        | 0.51  | -0.67            | 0.38  | -0.76            | 0.41  |
| C <sub>3</sub> H <sub>8</sub> → C <sub>3</sub> H <sub>7</sub> + H   | 0.06         | 0.72  | -0.55            | 0.52  | -0.70            | 0.29  |
| C <sub>3</sub> H <sub>7</sub> → C <sub>3</sub> H <sub>6</sub> + H   | -0.23        | 0.63  | -0.85            | 0.54  | -0.78            | 0.46  |
| C <sub>4</sub> H <sub>10</sub> → C <sub>4</sub> H <sub>9</sub> + H  | -0.13        | 0.78  | -0.51            | 0.46  | -0.83            | 0.27  |
| C <sub>4</sub> H <sub>9</sub> → C <sub>4</sub> H <sub>8</sub> + H   | -0.31        | 0.30  | -0.85            | 0.54  | -0.71            | 0.63  |
| C <sub>5</sub> H <sub>12</sub> → C <sub>5</sub> H <sub>11</sub> + H | -0.07        | 0.87  | -0.33            | 0.51  | -0.67            | 0.35  |
| C <sub>5</sub> H <sub>11</sub> → C <sub>5</sub> H <sub>10</sub> + H | -0.27        | 0.54  | -0.79            | 0.54  | -0.72            | 0.63  |
| C <sub>6</sub> H <sub>14</sub> → C <sub>6</sub> H <sub>13</sub> + H | -0.02        | 0.93  | -0.37            | 0.31  | -0.67            | 0.37  |
| C <sub>6</sub> H <sub>13</sub> → C <sub>6</sub> H <sub>12</sub> + H | -0.31        | 0.57  | -1.10            | 0.37  | -0.74            | 0.65  |

**Table S3.** Calculated reaction energies ( $\Delta E_r$ , eV) and energy barriers ( $E_a$ , eV) for the dehydrogenation reactions of  $C_2$ – $C_6$  *n*-alkanes on  $Pt_{38}$ .

| Reactions                             | $Pt_{38}$    |       |
|---------------------------------------|--------------|-------|
|                                       | $\Delta E_r$ | $E_a$ |
| $C_2H_6 \rightarrow C_2H_5 + H$       | -0.58        | 0.33  |
| $C_2H_5 \rightarrow C_2H_4 + H$       | -0.60        | 0.58  |
| $C_3H_8 \rightarrow C_3H_7 + H$       | -0.51        | 0.39  |
| $C_3H_7 \rightarrow C_3H_6 + H$       | -0.64        | 0.61  |
| $C_4H_{10} \rightarrow C_4H_9 + H$    | -0.60        | 0.39  |
| $C_4H_9 \rightarrow C_4H_8 + H$       | -0.57        | 0.78  |
| $C_5H_{12} \rightarrow C_5H_{11} + H$ | -0.49        | 0.45  |
| $C_5H_{11} \rightarrow C_5H_{10} + H$ | -0.56        | 0.80  |
| $C_6H_{14} \rightarrow C_6H_{13} + H$ | -0.49        | 0.47  |
| $C_6H_{13} \rightarrow C_6H_{12} + H$ | -0.55        | 0.83  |

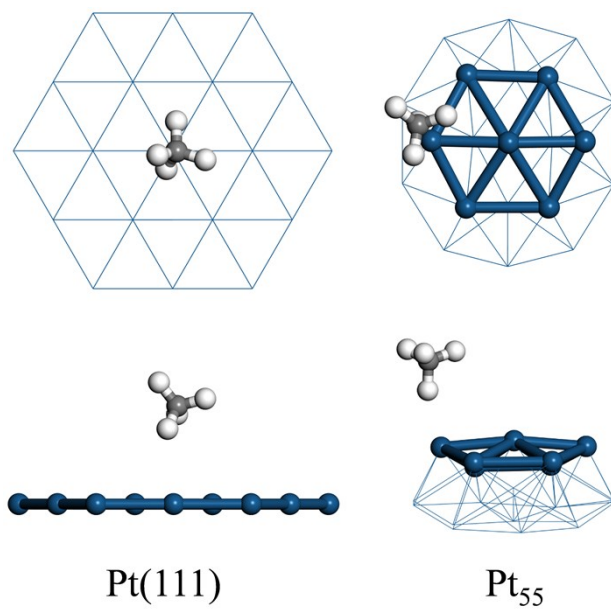

**Figure S1.** Adsorption configurations of CH<sub>4</sub> on Pt(111) and Pt<sub>55</sub>.

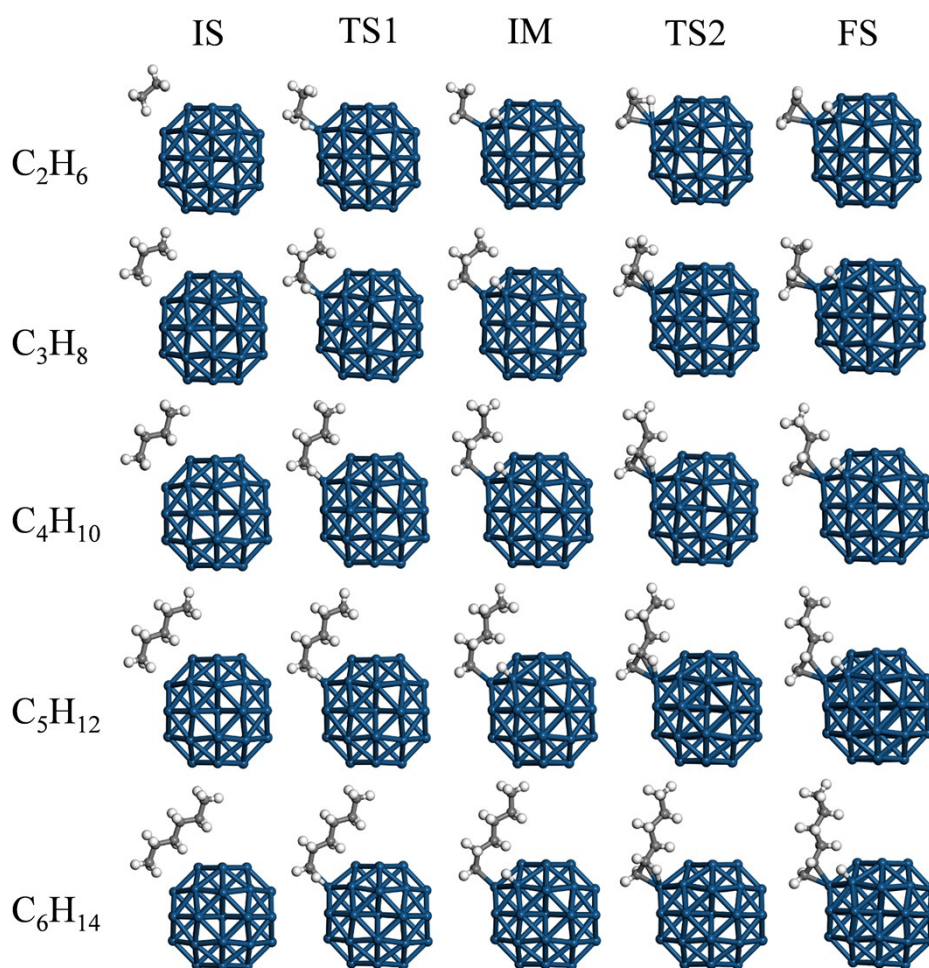

**Figure S2.** Dehydrogenation reactions of  $C_2$ – $C_6$  *n*-alkanes on  $Pt_{38}$ . IM denotes the alkyl groups generated from the first dehydrogenation step of alkanes, and the atomic H's co-adsorbed with the alkyls are omitted in the second dehydrogenation step for simplicity.

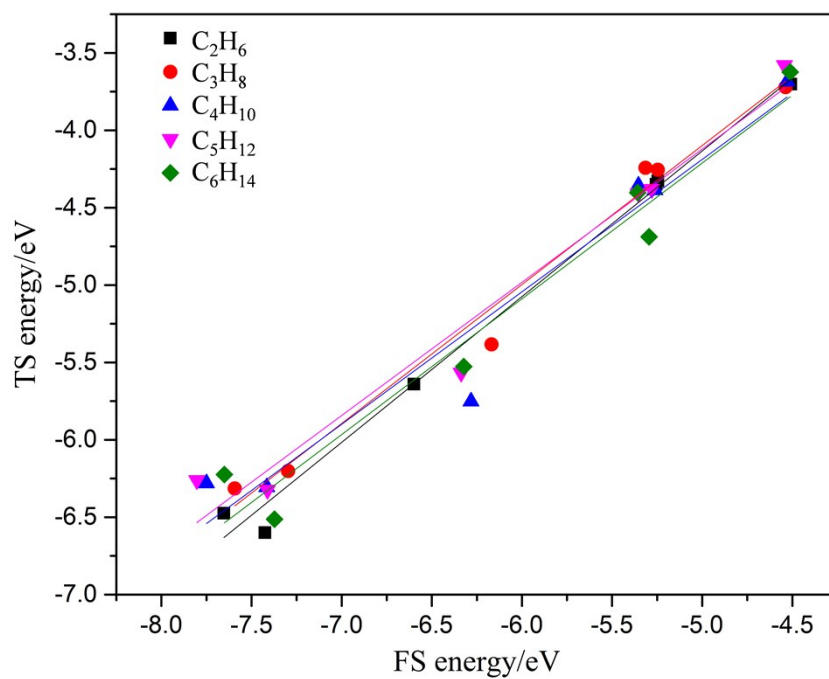

**Figure S3.** Linear fittings for the BEP relation based on the C–H bond-scission reactions of each alkane over Pt(111), Pt<sub>55</sub>, and Pt<sub>38</sub>. The fitted values of R<sup>2</sup> are 0.99, 0.98, 0.98, 0.97, and 0.96 for C<sub>2</sub>–C<sub>6</sub> *n*-alkanes, respectively.
